# Supplementary material for: The SH3 domain of UNC-89 (obscurin) interacts with paramyosin, a coiled-coil protein, in Caenorhabditis elegans muscle
Source: PubMed Central journal article supplement — Mol Biol Cell. 2016 May 15;27(10):1606–20. doi: 10.1091/mbc.E15-09-0675 (PMC4865318; doi:10.1091/mbc.e15-09-0675), 2016-05-15
Supplement: supp_E15-09-0675v1_CombinedSupMats.pdf [file supp_E15-09-0675v1_CombinedSupMats.pdf]

# Supplemental Materials

*Molecular Biology of the Cell*

Qadota et al.

Supplemental Table 1: List of oligonucleotide primers and their purposes

| Name | Property                               | Sequence                                           |
|------|----------------------------------------|----------------------------------------------------|
| GK1  | UNC-89 from ATG, +BamHI, Forward       | GGCGGATCCATGGCTAGTCGACGCCAAAAG                     |
| GK2  | deltaSH3, Forward                      | TCCAGTGACATTGCGCCGACCGAGTTTTACA                    |
| GK3  | deltaDH, Forward                       | ACAGGCGGCTCTTGCTCTAGAATTCACCAATA                   |
| GK4  | deltaPH, Forward                       | GCAACATCCAGGAGATGCAGAGGAGCAGGAGA                   |
| GK5  | until 1500 bp, +STOP, +XhoI, Reverse   | CGGCTCGAGTTAACCAGGGAACAAGCTGCTCTT                  |
| GK6  | deltaSH3, Reverse                      | TGTA AAAACTCGGTCGGCGCAATGTACTGGA                   |
| GK7  | deltaDH, Reverse                       | TATTGGTGAATTCTAGGACAAGAGCCGCCTGT                   |
| GK8  | deltaPH, Reverse                       | TCTCCTGCTCCTCTGCATCTCCTGGATGTTGC                   |
| GK9  | until SH3+27aa +XhoI, Reverse          | CGCCTCGAGTTAGACAAGAGCCGCCTGTTTCATC                 |
| GK10 | UNC-15 from aa221, +BamHI, Forward     | GCGGGATCCCAGAAGGTTCAACTCGATAAC                     |
| GK11 | until end of UNC-15, +Sall, Reverse    | CGCGTCGACTTAATAATCGTCTTCCGTGAC                     |
| GK12 | sequencing                             | ACAGAAGGAGGCTCTTGC                                 |
| GK13 | sequencing                             | GCTCTTGCTCGCGAGAAC                                 |
| GK14 | sequencing                             | AGCGGCGACCTTGCGTTG                                 |
| GK15 | -unc-15(-446)-Sall                     | CGCGTCGACTTAGGCGTCGGCAAGAGCCTCCTT                  |
| GK16 | BamHI-unc-15(294-)                     | GCGGGATCCGAGATCACCCAGTGAAGAGC                      |
| GK17 | -unc-15(-373)-Sall                     | CGCGTCGACTTATCTGGCACGCTCCAAGAGAGC                  |
| GK18 | -unc-15(-376)-Sall                     | CGCGTCGACTTAGAGTTGTTCTCTGGCACGCTC                  |
| GK19 | BamHI-unc-15(365-)                     | GCGGGATCC ACCATTGCTCTCTTGGAGCGT                    |
| GK20 | BamHI-58-                              | GCGGGATCCGGATCGGAATCCCGATCTTAT                     |
| GK21 | -131-STOP-XhoI                         | CGCCTCGAGTTATTGCTTGTA AAAACTCGGTCGG                |
| GK22 | PK2-Sall                               | CGCGTCGACTTATTTTCCATATTTGACTC                      |
| GK23 | SmaI-IK(1/3)                           | GCGCCCGGGTCTCCACGCCGTTCCACTCCA                     |
| GK24 | MscI-BamHI-SmaI-IK(1/3), with IK-PK2-4 | GCGTGGCCAGGATCCGCGGCCCGCCCGGGTCTCCACGCCGTTCCACTCCA |
| GK25 | SH3+27-SmaI, with BamHI-unc-89(N)      | CGCCCCGGGGACAAGAGCCGCCTGTTTCATC                    |
| GK26 | EcoRV-ATG                              | GCGGATATCATGGCTAGTCGACGCCAAAAG                     |

| Supplemental Table 2: Unc-89 SH3/DH/PH Region Yeast Two Hybrid |                  |        |                                        |                                        |
|----------------------------------------------------------------|------------------|--------|----------------------------------------|----------------------------------------|
| Table 2A: Number of Colonies                                   |                  |        |                                        |                                        |
| # Colonies Screened                                            | 442,600          |        |                                        |                                        |
| # His+                                                         | 1315             |        |                                        |                                        |
| # His+ and Ade+                                                | 85               |        |                                        |                                        |
| # His+ Only (retransformation)                                 | 4                |        |                                        |                                        |
| # Ade+ Only (retransformation)                                 | 3                |        |                                        |                                        |
| # His+ and Ade+ (retransformation)                             | 15               |        |                                        |                                        |
| Table 2B: Positive Preys                                       |                  |        |                                        |                                        |
| Clone                                                          | His+ and/or Ade+ | Gene   | Region (nucleotide #)                  | Region (amino acid #)                  |
| 1-1A                                                           | His+             | unc-15 | 681-2619                               | 227-873                                |
| 5-2A                                                           | Ade+             | unc-15 | 880-2619                               | 294-873                                |
| 6-1A                                                           | Ade+             | unc-15 | 880-2619                               | 294-873                                |
| 6-2A                                                           | His+ and Ade+    | unc-15 | 693-2619                               | 231-873                                |
| 7-2A                                                           | His+ and Ade+    | unc-15 | 746-2619                               | 249-873                                |
| 10-1A                                                          | His+ and Ade+    | unc-15 | 831-? *                                | 277-?                                  |
| 12-2A                                                          | His+ and Ade+    | unc-15 | 746-2619                               | 249-873                                |
| 14-2A                                                          | Ade+             | unc-15 | 746-2619                               | 249-873                                |
| 4-6A                                                           | His+ and Ade+    | unc-15 | 750-2619                               | 250-873                                |
| 6-5A                                                           | His+ and Ade+    | unc-15 | 887-? **                               | 291-?                                  |
| 7-4A                                                           | His+ and Ade+    | unc-15 | 720-2619                               | 240-873                                |
| 8-4A                                                           | His+ and Ade+    | spd-2  | 242-1685                               | 161-562                                |
| 8-10A                                                          | His+ and Ade+    | lev-11 | Isoform C: 407-771; Isoform G: 564-855 | Isoform C: 136-257; Isoform G: 188-348 |
| 9-3A                                                           | His+ and Ade+    | unc-15 | 663-2619                               | 221-873                                |
| 9-8A                                                           | His+ and Ade+    | unc-15 | 741-2619                               | 247-873                                |
| 10-5A                                                          | His+ and Ade+    | unc-15 | 831-? *                                | 277-?                                  |
| 10-6A                                                          | His+ and Ade+    | unc-15 | 831-? *                                | 277-?                                  |
| 10-8A                                                          | His+             | unc-15 | ?-2619                                 | ?-873                                  |
| 10-8B                                                          | His+             | unc-15 | 880-2619                               | 294-873                                |
| 12-3A                                                          | His+             | unc-15 | 845-?***                               | 282-?                                  |
| 14-3A                                                          | His+ and Ade+    | unc-15 | 750-2619                               | 250-873                                |
| 14-4A                                                          | His+ and Ade+    | unc-15 | 746-2619                               | 249-873                                |
| * DNA sequencing of 10-1A 3' yielded Y41D4A.5 mRNA             |                  |        |                                        |                                        |
| ** No results from DNA sequencing found for 6-5A 3'            |                  |        |                                        |                                        |
| *** 3' sequence is not aligned                                 |                  |        |                                        |                                        |

## ONLINE SUPPLEMENTAL MATERIAL

**Table 1.** List of oligonucleotide primers and their purposes.

**Table 2.** Results of yeast 2-hybrid library screen using UNC-89 SH3-DH-PH

# Supplemental figure 1

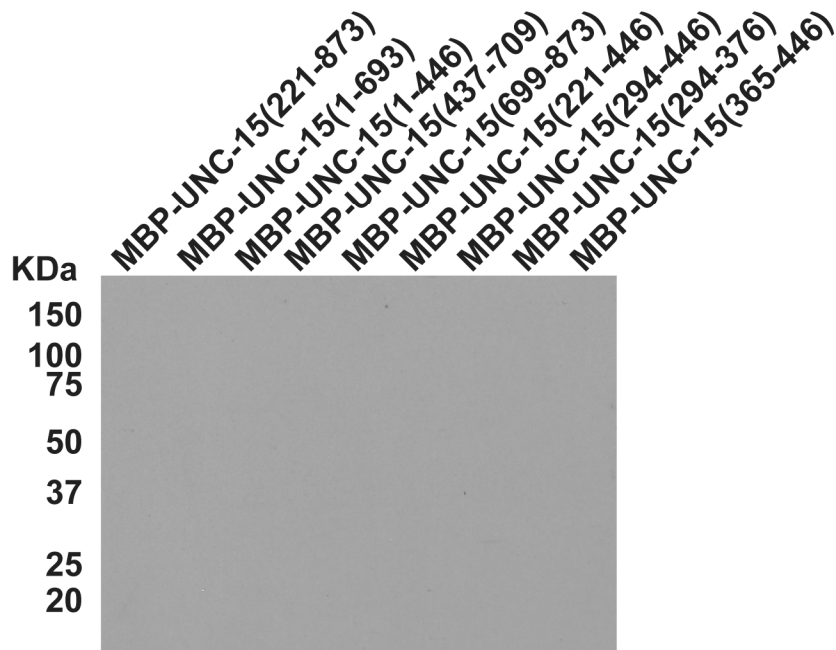

**Incubate: GST**

**Antibody: anti-GST-HRP**

**Supplemental Figure 1.** Far western shows that GST does not interact with any portion of paramyosin. The indicated portions of UNC-15 (paramyosin) as MBP fusion proteins were separated by SDS-PAGE, transferred to a membrane, incubated with GST in solution, washed, incubated with anti-GST-horseradish peroxidase, washed and detected by ECL. Positions of molecular weight standards are indicated on the left.

## Supplemental figure 2

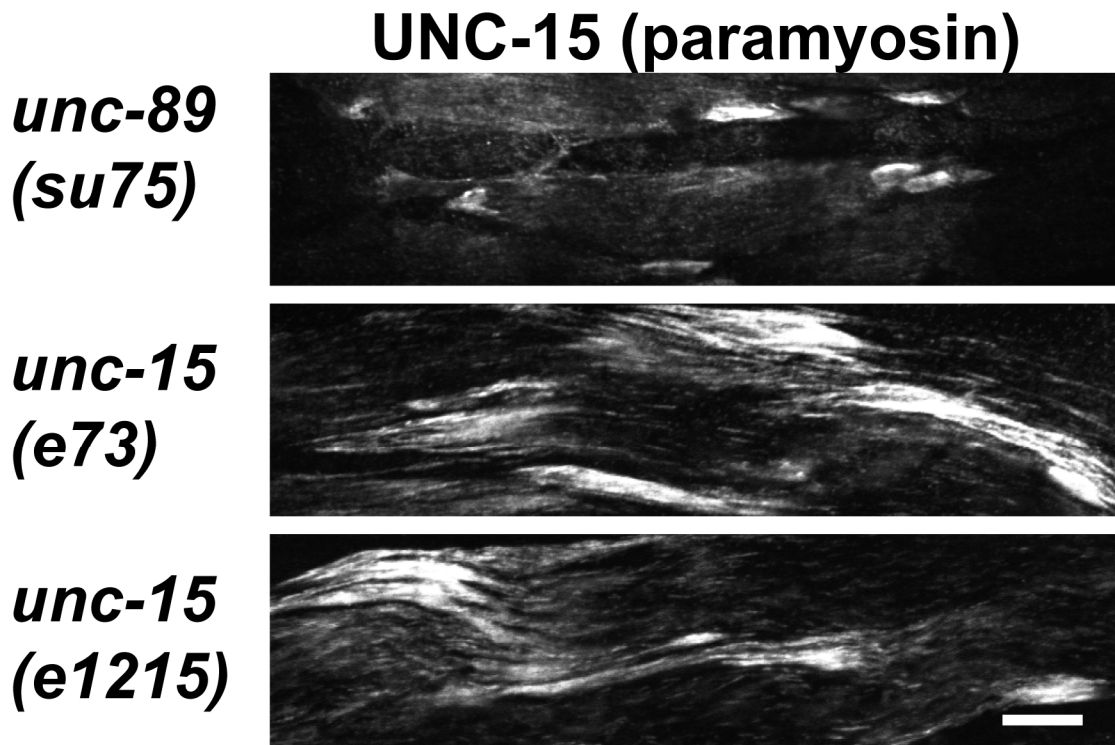

**Supplemental Figure 2. Less severe accumulations of UNC-15 (paramyosin) in *unc-89(su75)* than there is in two *unc-15* missense alleles.** Immunostaining of the indicated strains with anti-paramyosin. Several body wall muscle cells are shown. Scale bar, 10  $\mu\text{m}$ .

# Supplemental figure 3

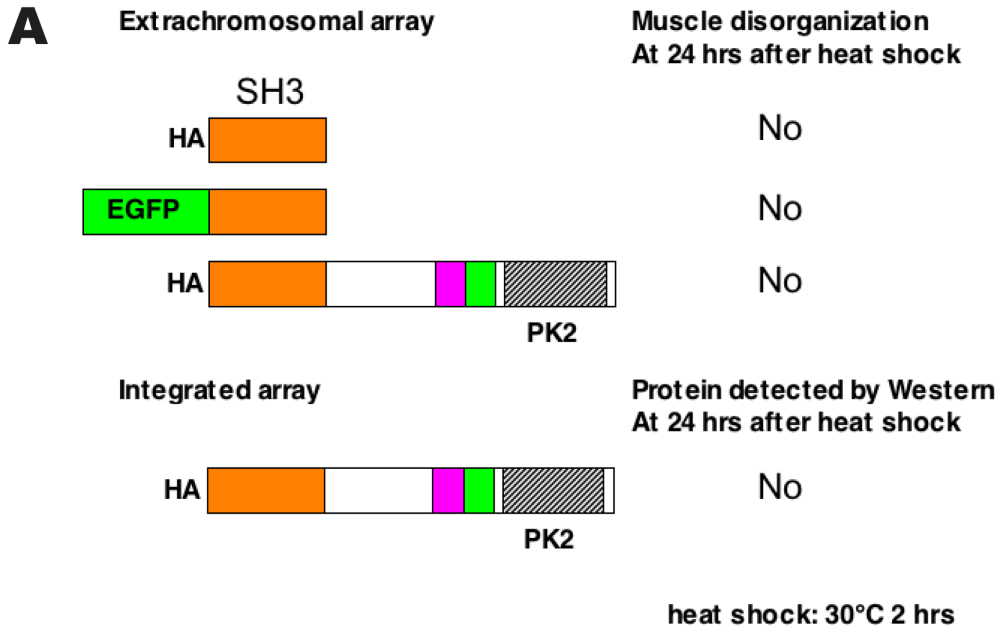

**B** HA-SH3-1/3IK-Ig-Fn-PK2  
after heat shock (hr)

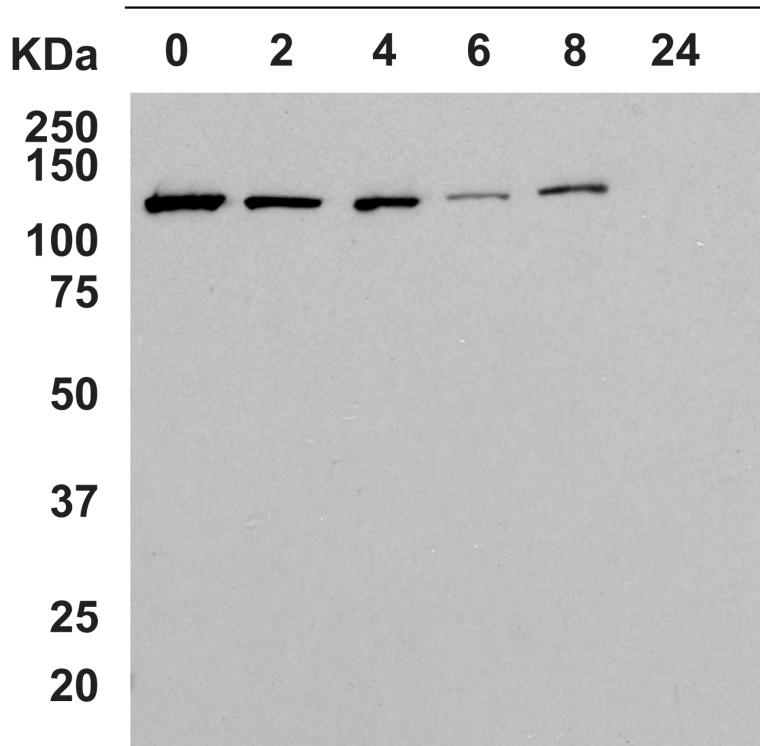

**Supplemental Figure 3.** Portions of UNC-89 that were expressed as HA or EGFP tagged fusion proteins in transgenic nematodes. (A) The SH3 domain by itself, or when artificially fused to 1/3IK-Ig-Fn-PK2 were expressed either from extrachromosomal arrays or as integrated arrays, as indicated. Expression was induced by heat shock ( $30^{\circ}$  for 2 hours) and then allowed to recover at  $20^{\circ}$  for 24 hours before extracts were made. Note that either muscle disorganization did not occur, or that the fusion protein was not detected by western blot. (B) Western blot detecting heat-shock-induced expression ( $30^{\circ}$  for 2 hours) of HA-SH3-1/3IK-Ig-FN-PK2, after recovery at  $20^{\circ}$  at the indicated times after heat shock.

# Supplemental figure 4

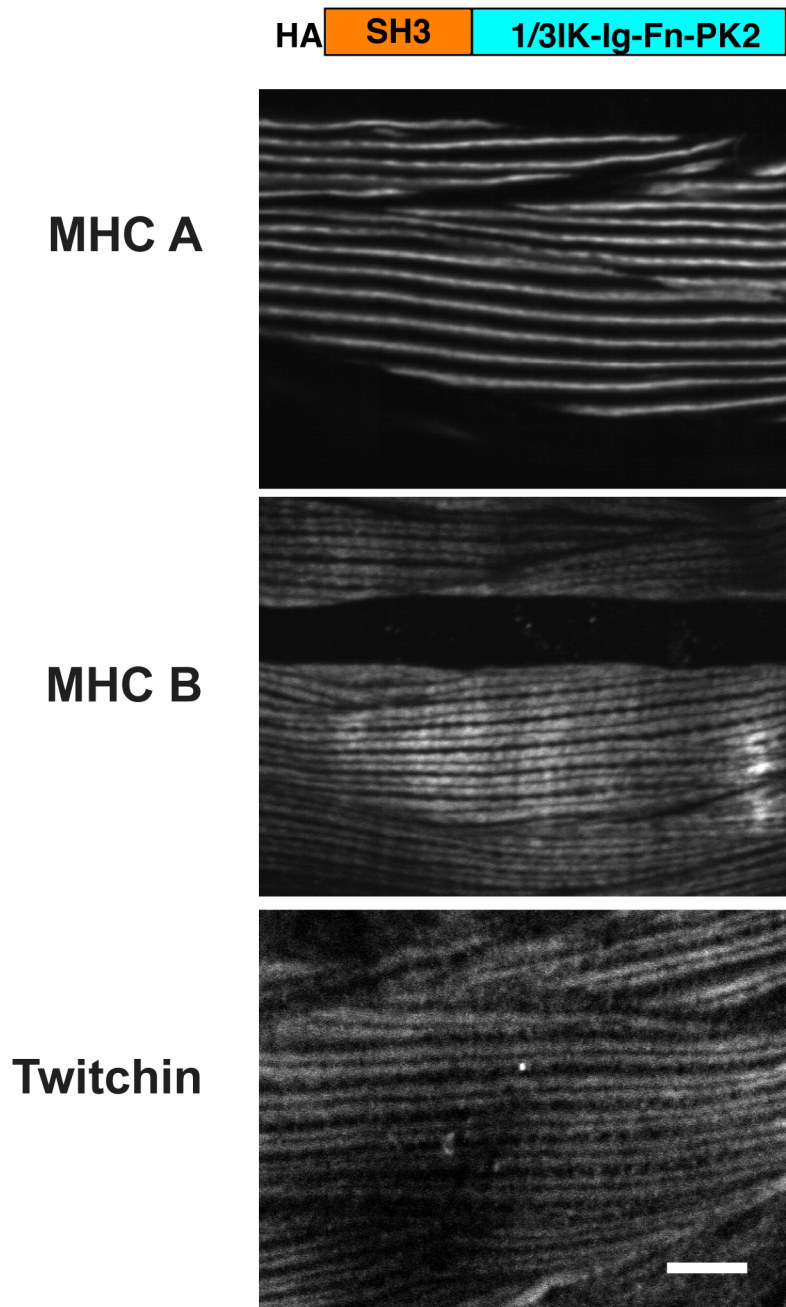

**Supplemental Figure 4.** Heat shock induced by 24-hours at 30<sup>0</sup> of HA-SH3-1/3IK-Ig-Fn-PK2 has no effect on muscle structure. Each panel shows staining with antibodies to MHC A, MHC B and twitchin. Localization patterns are normal. Scale bar, 10  $\mu$ m.





# Supplemental figure 5

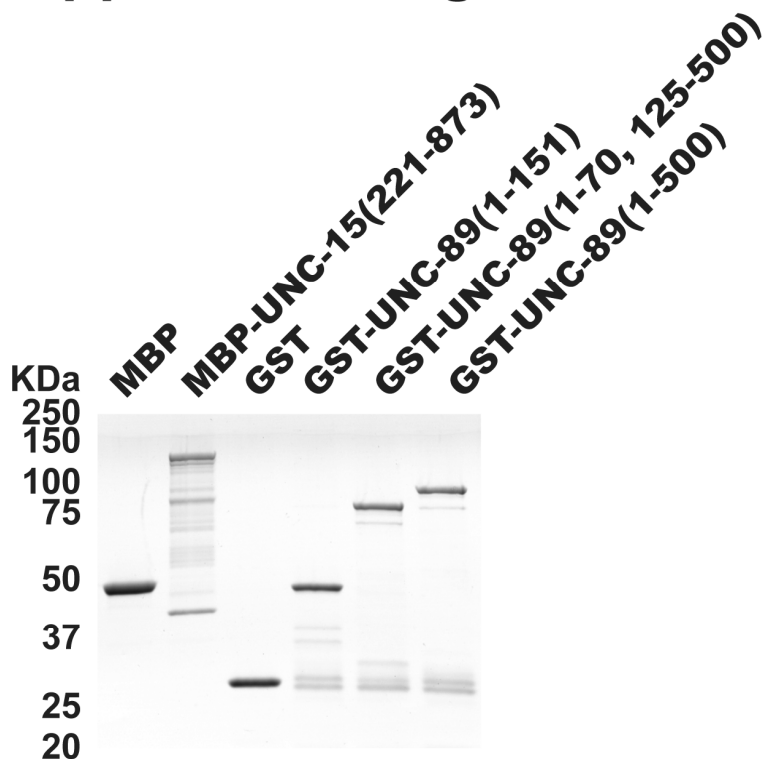

CBB staining

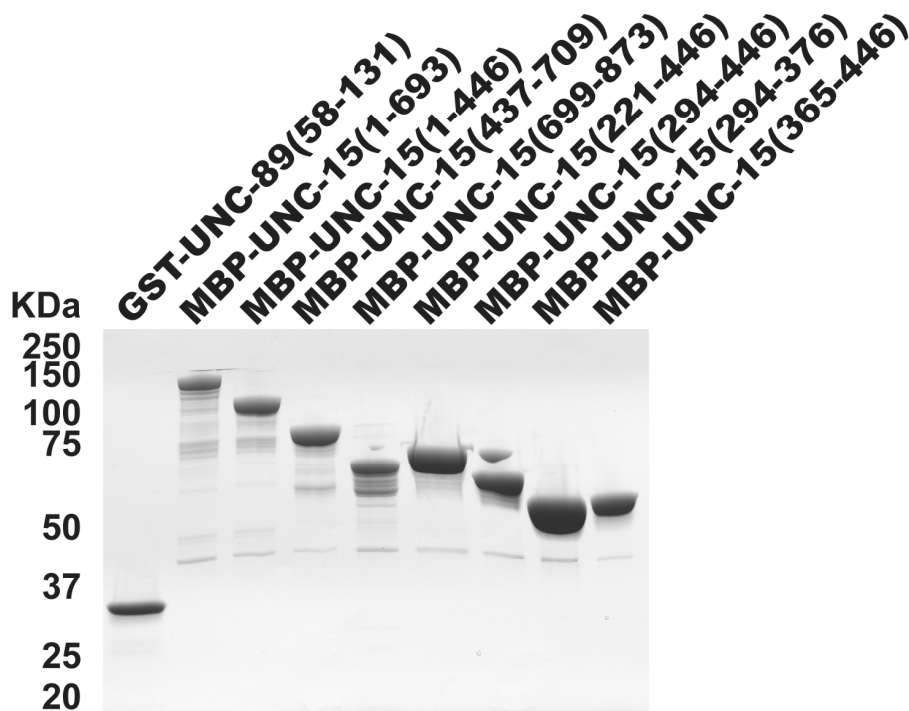

CBB staining

**Supplemental Figure 5.** SDS PAGE stained with Coomassie Blue of bacterially expressed recombinant fusion proteins used in *in vitro* binding experiments. Approx. 2  $\mu\text{g}$  of each protein was separated on a 10% polyacrylamide gel. Positions of molecular weight standards are indicated.
